# Lesions of the Fasciculus Retroflexus Alter Footshock-Induced cFos Expression in the Mesopontine Rostromedial Tegmental Area of Rats

Paul Leon Brown<sup>1,2\*</sup>, Paul D. Shepard<sup>1,2</sup>

**1** Maryland Psychiatric Research Center, Department of Psychiatry, University of Maryland School of Medicine, Baltimore, Maryland, United States of America, **2** Program in Neuroscience, University of Maryland, Baltimore, Maryland, United States of America

## Abstract

Midbrain dopamine neurons are an essential part of the circuitry underlying motivation and reinforcement. They are activated by rewards or reward-predicting cues and inhibited by reward omission. The lateral habenula (lHb), an epithalamic structure that forms reciprocal connections with midbrain dopamine neurons, shows the opposite response being activated by reward omission or aversive stimuli and inhibited by reward-predicting cues. It has been hypothesized that habenular input to midbrain dopamine neurons is conveyed via a feedforward inhibitory pathway involving the GABAergic mesopontine rostromedial tegmental area. Here, we show that exposing rats to low-intensity footshock (four, 0.5 mA shocks over 20 min) induces cFos expression in the rostromedial tegmental area and that this effect is prevented by lesions of the fasciculus retroflexus, the principal output pathway of the habenula. cFos expression is also observed in the medial portion of the lateral habenula, an area that receives dense DA innervation via the fr and the paraventricular nucleus of the thalamus, a stress sensitive area that also receives dopaminergic input. High-intensity footshock (120, 0.8 mA shocks over 40 min) also elevates cFos expression in the rostromedial tegmental area, medial and lateral aspects of the lateral habenula and the paraventricular thalamus. In contrast to low-intensity footshock, increases in cFos expression within the rostromedial tegmental area are not altered by fr lesions suggesting a role for non-habenular inputs during exposure to highly aversive stimuli. These data confirm the involvement of the lateral habenula in modulating the activity of rostromedial tegmental area neurons in response to mild aversive stimuli and suggest that dopamine input may contribute to footshock-induced activation of cFos expression in the lateral habenula.

**Citation:** Brown PL, Shepard PD (2013) Lesions of the Fasciculus Retroflexus Alter Footshock-Induced cFos Expression in the Mesopontine Rostromedial Tegmental Area of Rats. PLoS ONE 8(4): e60678. doi:10.1371/journal.pone.0060678

**Editor:** Hiromu Tanimoto, Max-Planck-Institut für Neurobiologie, Germany

**Received:** December 4, 2012; **Accepted:** March 1, 2013; **Published:** April 12, 2013

**Copyright:** © 2013 Brown, Shepard. This is an open-access article distributed under the terms of the Creative Commons Attribution License, which permits unrestricted use, distribution, and reproduction in any medium, provided the original author and source are credited.

**Funding:** This work was supported by a National Association for Research on Schizophrenia and Affective Disorders Independent Investigator Award (to PDS; bbrfoundation.org), a National Institutes of Mental Health grant (R01MH094489 to PDS; nimh.nih.gov), and a Ruth L. Kirschstein NRSA Award from the National Institute On Drug Abuse (F31DA030893 to PLB; drugabuse.gov). The content is solely the responsibility of the authors and does not necessarily represent the official views of the Brain and Behavior Research Foundation, the National Institute of Mental Health, the National Institute On Drug Abuse, or the National Institutes of Health (nih.gov). The funders had no role in study design, data collection and analysis, decision to publish, or preparation of the manuscript.

**Competing Interests:** The authors have declared that no competing interests exist.

\* E-mail: lbrown@mprc.umaryland.edu

## Introduction

Transient changes in midbrain dopamine (DA) neuron activity appear to encode a signal that optimizes action selection by promoting rewarding actions and suppressing non-optimal behaviors [1,2,3]. While midbrain DA neurons receive extensive glutamatergic input [4,5] that drives reward-induced neuronal activation [6], knowledge of the inhibitory inputs responsible for transient decreases in DA neuron activity following aversive stimuli [7,8,9,10] remains limited.

The habenula (Hb), a phylogenetically conserved epithalamic structure [11,12], is functionally and anatomically well positioned for encoding, in concert with midbrain DA neurons, the motivational value of aversive stimuli [13,14,15]. Activation of the lateral Hb (lHb) follows both nociception [16,17,18] and the absence of expected rewards [19]. In addition, habenular activity in humans correlates with negative reward prediction errors [20]. Conversely, lesions of the lHb in rats increase impulsivity [21], and sucrose- and cocaine-seeking [22,23], behaviors normally associ-

ated with elevations in DA activity. This suggests that habenular activation acts as a 'brake' on midbrain DA neuronal firing.

Several laboratories have shown that direct activation of the lHb leads to widespread inhibition of DA neurons in the substantia nigra and ventral tegmental area (VTA) [19,24,25], potentially modulating negative error signals in the brain [15,26]. Lesions of the fasciculus retroflexus (fr), the primary pathway conveying lHb projections to the midbrain, block lHb-induced DA inhibition [25]. However, since lHb efferents are glutamatergic [4,27,28], a disynaptic pathway is implied, which has been shown to include an intervening GABAergic neuron [25]. Although glutamatergic axons arising from the lHb primarily synapse on GABAergic neurons in the midbrain [27], lHb innervation of substantia nigra and VTA neurons is relatively sparse and does not selectively target GABAergic neurons [28], suggesting they are not solely responsible for the population-level inhibition of DA neuron activity observed in response to lHb stimulation.

A recently described brain region, the mesopontine rostromedial tegmental area (RMTg or tail of the VTA) receives a dense

projection from the LHb, is comprised of GABAergic neurons that project massively to midbrain DA neurons [29,30] and expresses Fos positive cells in response to psychostimulants such as d-amphetamine [31] and aversive stimuli such as footshock [32]. RMTg neurons are excited by footshock, cues predicting footshock, and the unexpected omission of a predicted reward [32,33]. The RMTg is also strongly activated by the same stimuli that activate LHb neurons [34]. RMTg lesions in rats impair the expression of fear- and anxiety-related behaviors [32], which could reflect a deficit in the encoding of aversive stimuli. These data suggest that the RMTg is likely to be a component of a circuit encoding aspects of aversive stimuli, serving as an inhibitory relay between the LHb and midbrain DA neurons [35].

Since the LHb projects heavily to the RMTg, and both areas respond similarly to aversive stimuli, it is plausible that removal of habenular input would diminish RMTg activation following an aversive stimulus. To test this hypothesis, we quantified cFos-like immunoreactivity in the RMTg following electrolytic lesions of the fr using two footshock protocols: low-intensity shock previously shown to produce cFos expression in the RMTg [32] and high-intensity shock, predicting that fr lesions would diminish cFos expression in the RMTg of shocked rats. Since DA efferents ascend within the fr forming reciprocal connections with LHb projection neurons [36,37], and these efferents would also be destroyed during fr lesion, we also sought to determine whether ascending projections contribute to the response of LH neurons to nociceptive stimuli. To accomplish this, cFos expression following shock was determined in each of the three principal subregions of the Hb including the medial (mHb), medial subnucleus of the lateral (LHbm), and lateral subnucleus of the lateral (LHbl) habenula. cFos expression in the posterior paraventricular nucleus of the thalamus (PVTp), a DA innervated, stress responsive structure, was also assessed.

## Materials and Methods

### Ethics Statement

This study was conducted in strict accordance with recommendations in The Guide for the Care and Use of Laboratory Animals of the National Institutes of Health [38]. All procedures were approved by the University of Maryland School of Medicine Institutional Animal Care and Use Committee (A3200-01).

### Subjects

Sixty-nine male Sprague-Dawley rats (250–270 g; Charles River, Wilmington, MA) were delivered to the animal facilities at the Maryland Psychiatric Research Center and maintained on a 12:12 h light:dark cycle with food and water *ad libitum*. Rats were given a minimum of 48 hr to acclimate before surgery. Coordinates for lesions and structure demarcations were taken from Paxinos and Watson [39].

### Surgery

At the time of surgery, rats were anesthetized with isoflurane (2–5% in 100% O<sub>2</sub>) to the point of non-responsiveness to a toe pinch and maintained at that level throughout the procedure. A feedback controlled heating pad was used to maintain body temperature at 36°C. Rats were mounted in a stereotaxic instrument using atraumatic ear bars and two small burr holes were drilled through the skull above and lateral to the fr (AP: –4.5; ML: +/–2.0) before retracting the dura. Bilateral cathodal lesions of the fr were produced by passing a constant current (0.35 mA, 8s; Isolated Pulse Stimulator Model 2100, A-M Systems, Carlsborg, WA) through a concentric, bipolar electrode

(SNEX-100X, Rhodes Medical Instruments, Summerland, CA) positioned within the fr (DV: –7.5 @ 10°). Sham rats underwent the same surgical procedure but no current was passed through the electrodes. All rats were given 10 days to recover before being exposed to shock.

### Shock Procedure

Sham and fr lesioned rats were randomly assigned to either shocked or unshocked groups. Three days prior to shock exposure, all rats were habituated to the shock environment for a time period equivalent to that of the shock session. The shock environment was one side of a two chamber shuttle box (21×21×16 cm; Med Associates, St. Albans, VT) configured to deliver scrambled shocks to metal floor bars. The chamber was equipped with a pair of parallel horizontal infrared photobeams positioned 3 cm above the floor and 12 cm apart. Photobeam breaks were recorded as a measure of locomotion in the high-intensity footshock experiment. Between sessions, the box was wiped clean with 70% ethanol. Experiments utilizing low- and high-intensity shock procedures were not run concurrently resulting in procedural differences that are described below.

Rats in the low-intensity footshock group received four, 0.5 mA shocks (duration 0.5 s) across a 20 minutes session. Rats in the high-intensity footshock group were exposed to a modified version of learned helplessness induction [40] receiving 120, 0.8 mA shocks (pseudo-random duration of 5 s to 15 s) across a 40 minute session. At the end of the session all rats were returned to their home cage. Ninety minutes after the start of the shock session rats were administered 0.5 ml ip Euthasol (390 mg/ml sodium pentobarbital and 50 mg/ml phenytoin sodium; Virbac Animal Health, Ft. Worth, TX) and perfused transcardially with 100 ml 4°C phosphate buffered saline (PBS). This was followed by perfusion with 500 ml freshly made 4% paraformaldehyde solution, in 0.1 M phosphate buffer (PB; pH 7.4, 4°C, low-intensity footshock groups) or 500 ml 6% formalin (pH 7.4, 4°C; high-intensity footshock groups). Brains were rapidly removed and post-fixed 12 hours (low-intensity) or 30 min (high-intensity groups) prior to sectioning on a vibrating tissue slicer (VT 1200, Leica, Buffalo Grove, IL).

### Immunohistochemistry

Coronal sections (40 μm) were obtained through the rostral-caudal extent of the Hb and RMTg. Sections not processed for immediate immunostaining were stored in cryoprotectant (30% sucrose, 30% ethylene glycol, 1% PVP-40 in PBS at 4°C). For cFos staining we used the 3–3'-diaminobenzidine (DAB) reaction with nickel enhancement. Omission of the primary and secondary antibodies were used as negative controls in all incubations.

### cFos with Low-intensity Footshock

Systematically random sampled sections spaced at 240 μm apart were incubated at 4°C successively, with 3 PBS rinses following each step, in: 1) 0.3% H<sub>2</sub>O<sub>2</sub> in PBS for 30 min, 2) 3.0% Normal goat serum, 0.3% Triton-X in PBS for 2 hrs, 3) rabbit anti-cFos polyclonal primary antibody (Ab5, 1:5000; EMD Chemicals, San Diego, CA), 1.0% Normal goat serum, 0.3% Triton-X in PBS for 60 hours, 4) biotinylated goat anti-rabbit secondary antibody (BA-1000; 1:600; Vector Laboratories, Burlingame, CA), 1.0% Normal goat serum, 0.3% Triton-X in PBS for 2 hours, 5) avidin-biotin immunoperoxidase (ABC Elite Kit PK-6100, Vector Laboratories, Burlingame, CA) in PBS for 30 min, and 6) 0.03% DAB, 0.02% nickel ammonium sulfate in PBS for 2–5 min.

### cFos with High-intensity Footshock

The immunostaining procedure with the high-intensity footshock groups was altered to match the procedure used in other laboratories investigating cFos expression in the RMTg [32]. Systematically random sampled sections spaced at 120  $\mu\text{m}$  apart were incubated at room temperature successively, with 3 PBS rinses following each step, in 1) 0.3%  $\text{H}_2\text{O}_2$  in PBS for 30 min, 2) rabbit anti-cFos polyclonal primary antibody (1:5000), 3.0% Normal goat serum, 0.3% Triton-X in PBS overnight, 3) biotinylated goat anti-rabbit secondary antibody (1:600), 1.0% Normal goat serum, 0.3% Triton-X in PBS for 30 min, 4) avidin-biotin immunoperoxidase in PBS for 30 min, and 5) 0.03% DAB, 0.02% nickel ammonium sulfate in PBS for 2–5 min. This change in the immunostaining procedure led to increased object/background contrast relative to the procedure used in the low-intensity experiment.

### Tyrosine Hydroxylase (TH)

Sections adjacent to cFos processed sections were immunostained for TH using DAB-nickel with cobalt chloride to create a gray-blue product. Sections were incubated at room temperature successively, with 3 PBS rinses following each step, in 1) 0.3%  $\text{H}_2\text{O}_2$  in PBS for 30 min, 2) mouse anti-TH monoclonal primary antibody (22941; 1:50 000; Immunostar, Hudson, WI), 3.0% Normal goat serum, 0.3% Triton-X in PBS overnight, 3) biotinylated goat anti-mouse secondary antibody (BA-9200; 1:400; Vector Laboratories, Burlingame, CA), 1.0% Normal goat serum, 0.3% Triton-X in PBS for 30 min, 4) avidin-biotin immunoperoxidase in PBS for 30 min, and 5) 0.03% DAB, 0.02% nickel ammonium sulfate, 0.02% cobalt chloride in PBS for 30–60 s.

### Quantification of cFos Positive Objects and TH Expression

All sections were mounted on glass slides, dried overnight, and coverslipped. For the Hb, PVTp, and RMTg, sections were analyzed that fell within  $-2.9$  to  $-4.0$ ,  $-2.9$  to  $-4.0$ , and  $-6.0$  to  $-7.0$  mm from Bregma respectively. Photographs were taken of each stained section using an Axioplan microscope with DP Controller software (Olympus, Center Valley, PA) at 10 $\times$ . Profile counts of cFos positive objects in the mHb, lHbm, lHbl, and PVTp were conducted at 20 $\times$  on the same microscope. Profile counts of cFos positive objects in the RMTg were obtained at 20 $\times$  on an BH-2 microscope with a camera lucida attachment (Olympus, Center Valley, PS). An object was counted as cFos positive if it 1) fell within the demarcated borders of the region of interest described below, 2) was between 5 and 15  $\mu\text{m}$  in diameter (mean size in all areas was 9  $\mu\text{m}$ ), 3) had a round or oval appearance, and 4) could easily be differentiated from the background stain.

Demarcation of the borders of the Hb subregions (mHb, lHbm, lHbl) and PVTp were outlined on photomicrographs of each structure of interest for each section using Paxinos and Watson as a guide ([39], see Figure 1D,F). Demarcation of the RMTg core and periphery was done in accordance with previous anatomical descriptions [32,30, see Figure 1B]. Briefly, a 500  $\mu\text{m}$  diameter circle overlaid on the decussating fibers of the tegmentum and superior cerebellar peduncle constituted the RMTg core, while a 1000  $\mu\text{m}$  diameter circle positioned with its center on the lateral edge of the RMTg core constituted the RMTg periphery.

Total volume of the Hb, Hb subregions (mHb, lHbm, lHbl) and PVTp was determined by using commercial software (AIS, Imaging Research Inc.) to calculate the area of each demarcated region of interest for each sampled section. These areas, the number of sections, and distance between sections were used to determine the reference volume ( $V_{\text{ref}}$ ) using the Cavalieri method.

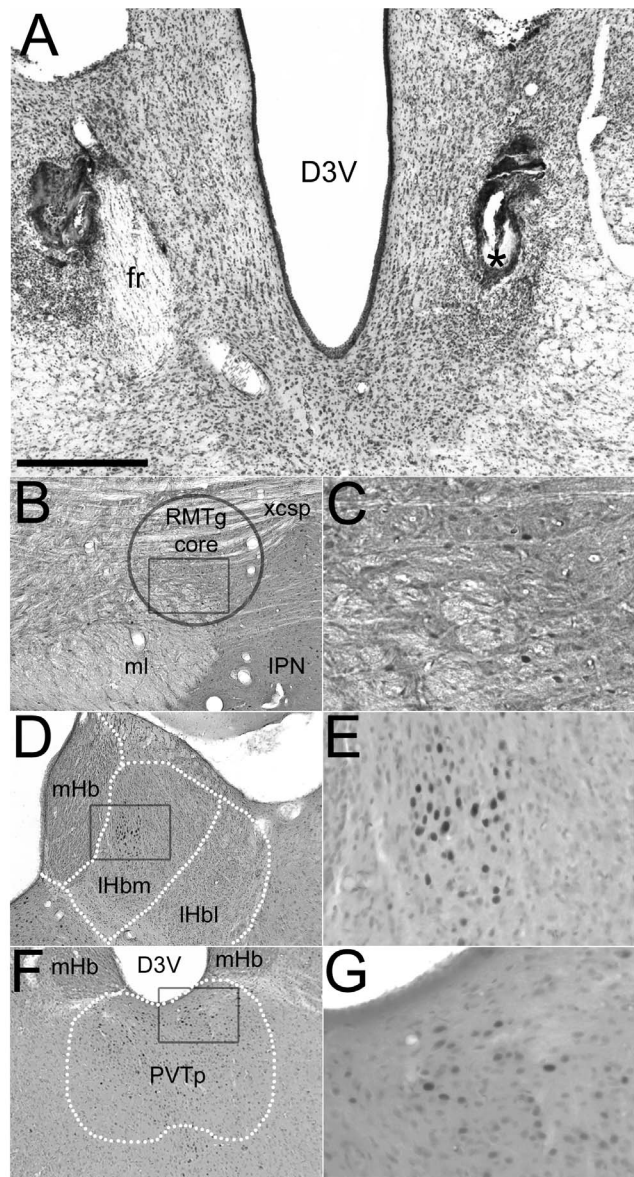

**Figure 1. Representative photomicrographs illustrating the effects of low-intensity footshock on the expression of cFos in the RMTg, Hb and PVTp in a sham operated rat.** Cresyl violet stain of a section with an incomplete fr lesion (left) and acceptable lesion (right, \*) from an excluded rat (A). cFos expression within the RMTg (B,C), habenula (D,E) and PVTp (F,G). Boxes within the low-magnification micrographs (left) approximate the area of the high-magnification illustrations (right), which show visible cFos positive objects. The RMTg core is the area within the circle (B; for a complete description of RMTg boundaries see [30,31]). Dotted lines delineate the mHb, lHbm, and lHbl (D) and PVTp (F). Scale bar = 500  $\mu\text{m}$  (A, B, D, F), 125  $\mu\text{m}$  (C, E, G). D3V = dorsal third ventricle, xcsp = decussation of the superior cerebellar peduncle, IPN = interpeduncular nucleus, ml = medial lemniscus, doi:10.1371/journal.pone.0060678.g001

$V_{\text{ref}}$  for the RMTg core and periphery was calculated in a similar manner within fixed areas demarcated by the circular borders. TH immunostaining in the Hb and PVTp was outlined and the areas of these regions used to determine TH  $V_{\text{ref}}$  in the same manner. Using counts of cFos positive objects and the  $V_{\text{ref}}$ , the estimated number of cFos positive objects per  $\text{mm}^3$  ( $N_v$ ) was determined for

each region of interest utilizing an Abercrombie correction factor with an average object size of 9  $\mu\text{m}$ .

### Lesion Determination and Statistics

fr lesions from cresyl violet stained sections for each rat were drawn using the camera lucida at 10 $\times$ . Area of the remaining fr was calculated bilaterally and compared to shams. Rats were included in the study if lesions reduced the fr by 50% or more on each side. Fourteen rats were excluded from the study based on suboptimal lesions ( $n=9$ ), death during the surgical recovery period ( $n=2$ ), or poor tissue preservation ( $n=3$ ). Average lesion size of rats included in the study was 72% (IQR, 62–82%). An excluded rat with one suboptimal and one acceptable lesion is shown in Figure 1A. Data were analyzed using a three-way mixed analysis of variance (ANOVA; shock $\times$ lesion $\times$ subregion) for the RMTg core/periphery and a two-way ANOVA (shock $\times$ lesion) for all other brain areas. Tukey's test was utilized for all *post hoc* comparisons of ANOVAs with significant interaction effects. All data are expressed as the arithmetic mean  $\pm$  standard error of the mean.

### Results

Representative examples of cFos expression following exposure to low-intensity footshock in a sham rat are shown in Figure 1 for the RMTg (1B and 1C), Hb (1D and 1E) and PVTp (1F and 1G; see Figure S1 for representative photomicrographs from a footshocked, fr lesioned rat). cFos expression in the Hb following low-intensity footshock appeared to be limited to TH positive areas of the IHbm. Visual inspection suggested that TH innervation of the Hb was diminished in fr lesioned rats (Figure S3). This was confirmed by comparing the volume of TH immunoreactive fibers in both low-intensity ( $F_{(1,24)}=5.00$ ,  $p<0.05$ ) and high-intensity ( $F_{(1,21)}=85.85$ ,  $p<0.05$ ) experiments. There was no effect of footshock on TH expression in the habenula. TH expression within the PVTp was unaffected by fr lesion in the both the low-intensity ( $F_{(1,23)}=0.12$ ,  $p>0.05$ ) and high-intensity ( $F_{(1,21)}=1.32$ ,  $p>0.05$ ) groups. Locomotion during the three-habituation days preceding shock exposure was unaffected by fr lesion.

#### Low-intensity Footshock

The number of cFos positive objects within the RMTg of sham rats was increased by low-intensity footshock both in the core (+188%) and periphery (+106%) relative to unshocked shams (Figure 2). By contrast, cFos expression in fr lesioned rats exposed to low-intensity footshock was nearly identical to that of unshocked lesioned rats in both the RMTg core (+1%) and periphery (–2%). A three-way mixed ANOVA (shock $\times$ lesion $\times$ RMTg subregion) revealed a significant effect of shock ( $F_{(1,26)}=4.36$ ,  $p<0.05$ ), significant difference in RMTg subregion ( $F_{(1,26)}=29.96$ ,  $p<0.05$ ), and significant shock $\times$ lesion interaction ( $F_{(1,26)}=4.36$ ,  $p<0.05$ ). Post-hoc analysis confirmed a significant elevation of cFos positive objects in the RMTg core of footshocked shams compared to the RMTg core of no shock shams, no shock fr lesioned rats, and footshocked fr lesioned rats (Tukey,  $p<0.05$ ). Differences among groups within the RMTg periphery were not significant.

Since the Hb also responds to aversive stimuli, we counted cFos positive objects in each of its three subdivisions following low-intensity footshock. Within the mHb there was no significant main effect of shock or fr lesion (Figure 3). While cFos expression within the IHbm was elevated in footshocked shams relative to no shock shams, differences between these groups were attenuated in fr lesioned rats. Indeed there was a significant main effect of shock ( $F_{(1,24)}=6.40$ ,  $p<0.05$ ) but the lesion $\times$ shock interaction fell short

of significance ( $F_{(1,24)}=2.07$ ,  $p>0.05$ ). There was also a significant effect of shock in the IHbl ( $F_{(1,24)}=4.81$ ,  $p<0.05$ ), which was likely attributable to the difference between shocked and unshocked rats in the fr lesioned group since shock appeared to have no effect within the sham group. However, for the IHbl the shock $\times$ lesion interaction was not significant ( $F_{(1,24)}=1.05$ ,  $p>0.05$ ).

cFos counts within the PVTp were also obtained (Figure 3). The PVTp, like the Hb, expresses Fos in response to aversive stimuli [41,42,43], psychostimulants [44] and receives DA innervation from the midbrain [45,46,47,48]. Analysis of cFos positive objects in the PVTp (Figure 3D) showed a significant main effect of shock ( $F_{(1,23)}=9.41$ ,  $p<0.05$ ) with no effect of lesion ( $F_{(1,23)}=0.01$ ,  $p>0.05$ ) or the shock $\times$ lesion interaction ( $F_{(1,23)}<0.01$ ,  $p>0.05$ ).

#### High-intensity Footshock

The number of cFos positive objects in the RMTg was elevated in footshocked shams relative to their no shock counterparts in both the core (+428%) and periphery (+624%; Figure 4; Figure S3). Within fr lesioned rats, shock also elevated cFos in the RMTg core (+379%) and periphery (+253%) relative to no shock fr lesioned rats (Figure S4). Overall, a three-way ANOVA (shock $\times$ lesion $\times$ RMTg subregion) revealed a significant effect of shock ( $F_{(1,21)}=29.76$ ,  $p<0.05$ ), and significant difference in RMTg subregion ( $F_{(1,21)}=62.59$ ,  $p<0.05$ ). In contrast to the low-intensity experiment, footshock appeared to have the same effect on cFos expression in sham and fr lesioned rats as there was no significant main effect of lesion ( $F_{(1,21)}=0.390$ ,  $p>0.05$ ).

The effects of high-intensity footshock on cFos expression in the Hb are illustrated in Figure 5. Although there was a trend toward elevated cFos in the mHb following shock ( $F_{(1,21)}=3.97$ ,  $p=0.06$ ), no significant effects were present. Within the IHbm, there was a significant main effect of shock ( $F_{(1,21)}=26.61$ ,  $p<0.05$ ) while the main effect of lesion for the IHbm was not significant ( $F_{(1,21)}=0.71$ ,  $p>0.05$ ). Similarly, there was a significant main effect for shock ( $F_{(1,21)}=12.91$ ,  $p<0.05$ ) in the IHbl with no significant main effect of lesion ( $F_{(1,21)}=1.73$ ,  $p>0.05$ ). Like the IHbm, shock significantly increased cFos expression in the PVTp ( $F_{(1,21)}=29.08$ ,  $p<0.05$ ) and there was no main effect of lesion ( $F_{(1,21)}=0.26$ ,  $p>0.05$ ). There were no significant shock $\times$ lesion interactions in the high-intensity group in any of the areas examined.

### Discussion

Results from the present study provide new insights into the way aversive stimuli are processed by the habenular-RMTg circuit. First, low-intensity footshock increases cFos expression in IHb and the recently identified RMTg. Our results further show that lesions of the fr reduce footshock-induced cFos expression in the RMTg core, which implies that habenular efferents play a significant role in the activation of RMTg neurons in response to mildly aversive stimuli. However, fr lesions had no effect on RMTg cFos expression following high-intensity footshock. Since fr lesions were partially incomplete we cannot exclude the possibility that the remaining fibers in the fr were recruited during high-intensity stimulation. However, we found no evidence of a contribution made by lesion size to the main effect of shock on cFos expression in the RMTg (data not shown). The inability of fr lesions to prevent cFos expression in the RMTg following high intensity footshock suggests that other inputs to this region mediate this effect, possibly including brain areas directly involved in nociception. While Hb neurons exhibit graded responses to peripheral noxious stimuli there are no direct sensory nociceptive inputs to the IHb and lesions of the structure fail to alter pain threshold [49]

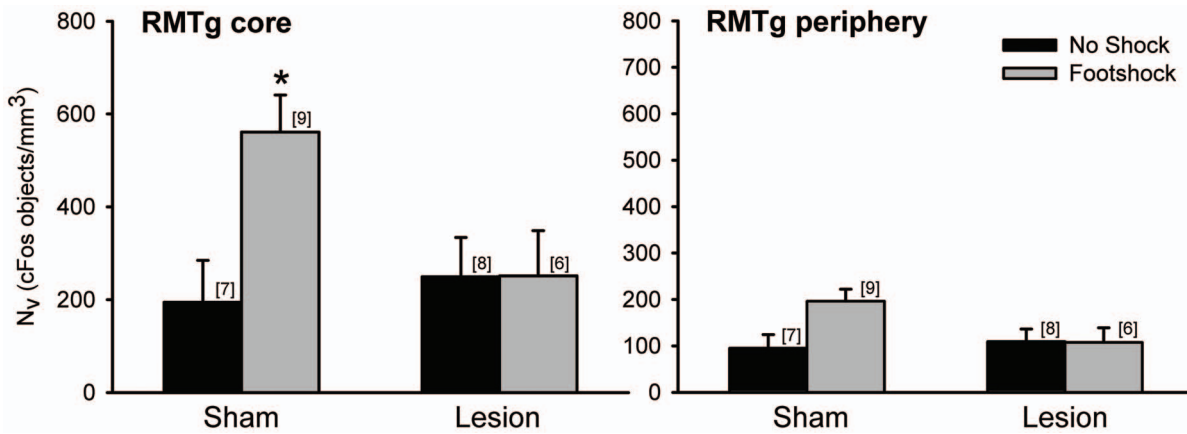

**Figure 2. cFos positive objects in the RMTg of rats exposed to low-intensity footshock.** Exposure to shock elevated cFos expression in the RMTg. Lesions of the fr prevented the increase in shock-induced cFos expression in the RMTg core; shocked sham rats showed significantly elevated cFos expression (\*, Tukey,  $p < 0.05$ ) relative to the other three conditions. In this and in all subsequent figures the number of subjects per group are indicated above each bar. doi:10.1371/journal.pone.0060678.g002

suggesting that habenular neurons are not directly involved in encoding pain intensity. Rather, IHb neurons appear to receive a “copy” of nociceptive information for use in behavioral integration [50]. It is possible that inputs to the RMTg from the Hb are among the first to be activated in response to mildly aversive stimuli. However, as the aversive nature of the stimulus

increase, other afferent inputs to the RMTg become principally responsible for driving the observed changes in cFos expression. It is worth noting in this regard that the RMTg receives one of its strongest inputs from the ventrolateral periaqueductal gray (PAG), a brain area that receives direct input from the spinothalamic tract and serves as a key component in nociception [29,30].

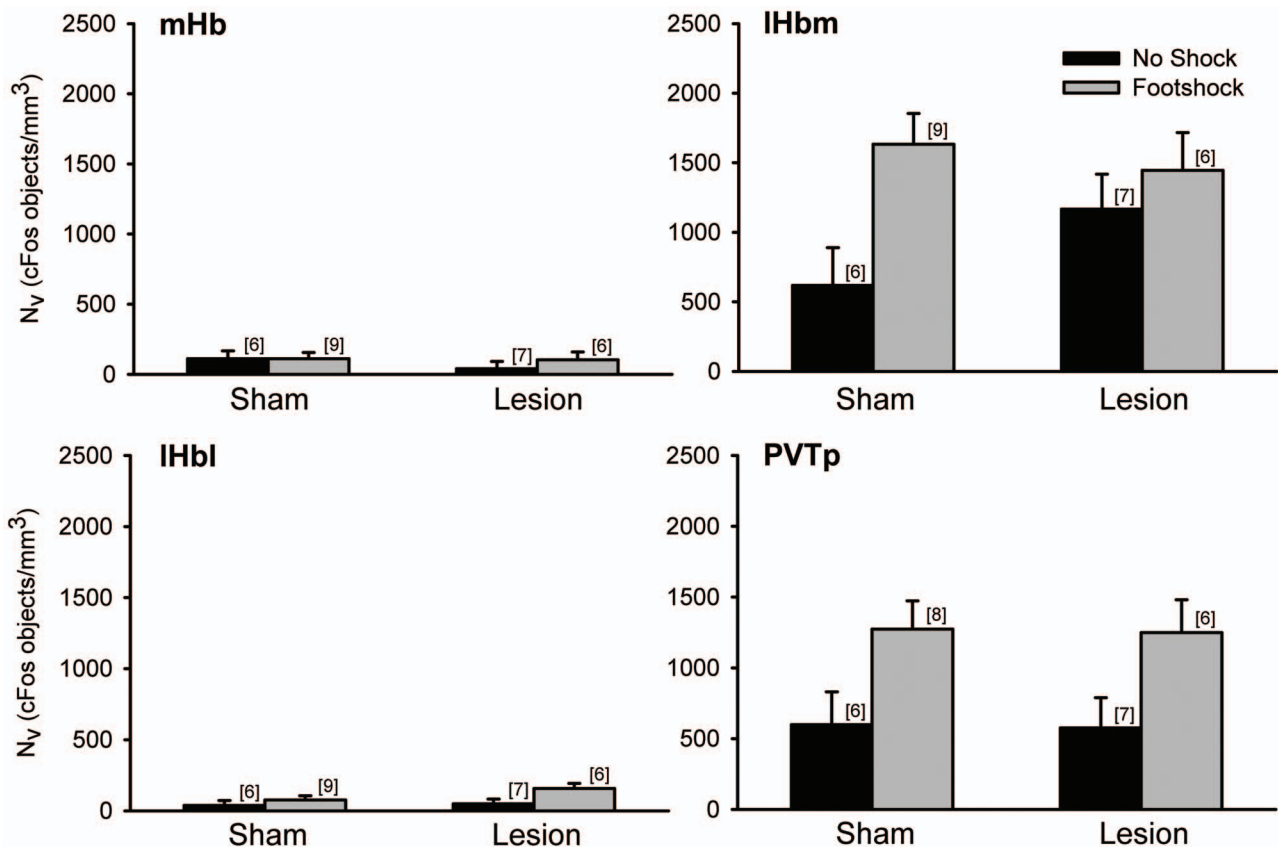

**Figure 3. cFos positive objects in the Hb of rats exposed to low-intensity footshock.** Neither shock nor fr lesions altered cFos expression in the mHb. There was a significant effect of shock for the IHbm, IHbl, and PVTp. However, there was no significant effect of lesion or shock×lesion interaction for these three areas. doi:10.1371/journal.pone.0060678.g003

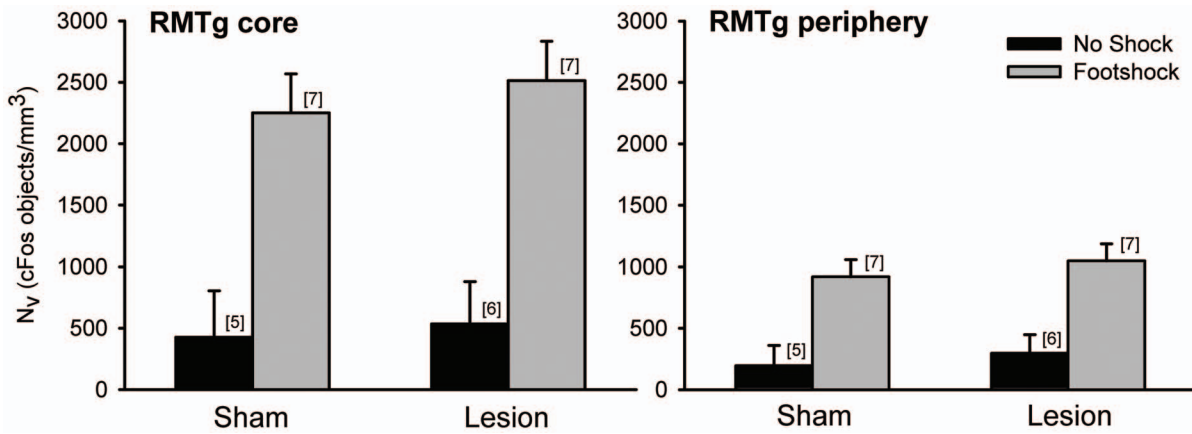

**Figure 4. cFos positive objects in the RMTg of rats exposed to high-intensity footshock.** Exposure to shock elevated cFos expression in the RMTg. Lesions of the fr had no effect on shock-induced cFos expression. Elevated cell counts in no shock rats relative to the low-intensity experiment may be the result of a change in immunostaining procedures (see Methods). doi:10.1371/journal.pone.0060678.g004

Second, while confirming that the habenula shows elevated cFos expression in response to aversive stimuli [51,52] we have also shown that these changes are regionally specific. The mHb appears to be completely unaffected by low- or high-intensity footshock, while the IHb responded to both low- and high-intensity footshock. cFos elevation occurs largely in the medial portion of the IHb a finding previously shown with novel and aversive stimuli

[51]. Elevated cFos expression in the lateral portion of the IHb has been repeatedly observed in response to psychomotor stimulants such as amphetamines [51,53,54], and cocaine [55,56]. It is worth noting that in the present work high-intensity footshock, like psychomotor stimulants, resulted in a substantial increase in cFos expression in the IHbl and that the IHbl receives a strong projection from the internal segment of the globus pallidus [57], an

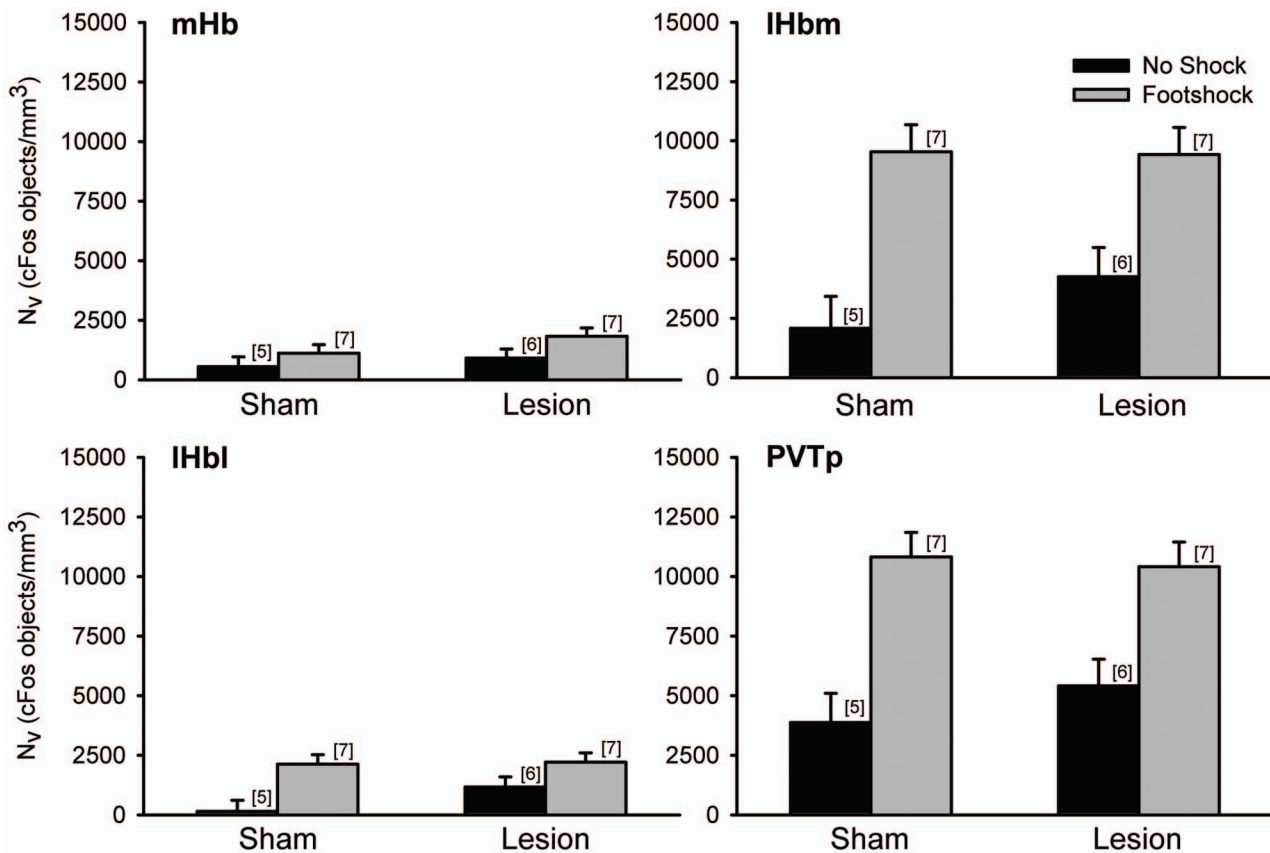

**Figure 5. cFos positive objects in the Hb of rats exposed to high-intensity footshock.** Neither shock nor fr lesion had an effect of cFos expression in the mHb. There was a significant effect of shock for the IHbm, IHbl, and PVTp. However, there was no significant effect of lesion or shock×lesion interaction for these three areas. doi:10.1371/journal.pone.0060678.g005



area critically involved in the regulation of voluntary movement. While we found no difference in locomotion between shocked and unshocked rats, the photobeams used here were not sensitive to vertical movement and consequently may not adequately account for all aspects of movement. Further studies would be necessary to test whether elevated IHbl cFos expression following footshock is a result of changes in locomotion.

Third, fr lesions may alter cFos expression in the Hb itself, as suggested by the trend toward an increase in cFos expression in the IHbm of fr lesioned rats not exposed to footshock. Moreover, as shown in Figure 1D and 1E, the increase in cFos expression following low-intensity footshock is localized in the IHbm near the parvocellular subnucleus. The IHbm contains a high-density of TH positive fibers (Figure S2A and [58]) and DA concentrations in this subregion are dramatically reduced by 6-OHDA lesions of the VTA [59]. Since ascending DA projections to the Hb travel within the fr [36,37], lesions of this pathway would be expected to reduce DA innervation of the Hb. This supposition is supported by the decrease in habenular TH immunostaining following fr lesion observed in the present study. While the effects of DA on IHb neurons are incompletely understood, the habenula shows decreased glucose utilization following acute administration of direct and indirect DA agonists [60,61] while showing increased utilization following acute administration of DA antagonists [61] and during morphine withdrawal [62]. These data suggest that DA in the IHbm is inhibitory and potentially involved in regulating the habenular response to aversive stimuli. Supporting this proposition, single pulse stimulation of the VTA leads to transient inhibition of pain responsive neurons in the LHb [63]. Given the tonic nature of DA neuron activity *in vivo*, loss of DA innervation of the IHbm may increase the basal activity of these habenular neurons via disinhibition (see however [64]). Such an increase in basal activity may explain why fr lesioned, unshocked rats had a trend, though non-significant, toward increased cFos expression within the IHbm. In support of this premise, tyrosine depletion reduces amphetamine-induced Fos immunoreactivity in the IHb of rats [65].

There are a number of alternate possibilities to consider. For example, it is conceivable that lesioning the descending fibers of the fr leads to retrograde neural degeneration and non-specific cFos expression in the Hb. Given that habenular efferents traveling within the fr originate from all regions of the nucleus it would be expected that fr lesions would increase cFos expression throughout the Hb. However, fr lesions failed to increase cFos expression in the mHb or IHbl of unshocked rats (Figures 3 and 5). Alternatively, fr lesions could lead to a generalized disruption in the encoding of aversive stimuli. To test this, we assessed cFos expression in the PVTp, an area in close proximity to the habenula that receives DA input [44,45], and is also responsive to aversive stimuli [41,42,43]. Despite these similarities to the IHbm we did not see a similar pattern of change in PVTp cFos expression. While generally supportive of a role for DA in altering habenular activity during exposure to aversive stimuli further studies are needed to clarify this feedback mechanism.

Recent tract tracing studies have shown that habenular projections to the RMTg arise mainly in the IHbl while the LHbm contributes to a lesser extent [66]. These authors also demonstrated that habenular projections to the VTA, specifically the DA neuron dense paranigral subnucleus, arise mainly from the parvocellular subnucleus of the IHbm. This would suggest that aversive events that activate the IHbm cause direct activation of some DA neurons. While the firing rate of most midbrain DA neurons are inhibited by aversive stimuli [10], a minority are activated by these events [67,68,69,70], and by stimuli predictive

of them [68,69,70]. Thus, direct glutamatergic projections from the IHbm to the substantia nigra and VTA could account for those DA neurons activated by aversive stimuli while feedforward inhibition mediated by IHb-induced activation of RMTg neurons is likely to account for the predominant inhibition seen after aversive stimuli.

Our current data demonstrate that the habenula plays a role in regulating RMTg activation following mildly aversive stimuli, habenular activation following aversive stimuli is sub-region specific, and may be altered by the loss of DA input. Since the habenula is affected by other monoamines [71,72] it will be important to ascertain to what extent changes seen here may be due specifically to the loss of DA input. While our results are consistent with the involvement of other afferents in activating RMTg neurons in response to noxious stimuli, they demonstrate that the habenula-RMTg pathway plays a role in the processing of mild aversive stimuli.

## Supporting Information

**Figure S1 Representative photomicrographs illustrating the effects of low-intensity footshock on the expression of cFos in the RMTg, Hb and PVTp in a fr lesioned rat.** cFos expression within the RMTg (A,B), habenula (C,D) and PVTp (E,F). Boxes within the low-magnification micrographs (left) approximate the area of the high-magnification illustrations (right), which show visible cFos positive objects within the Hb and PVTp, but not within the RMTg core. The RMTg core is the area within the circle (A). Dotted lines delineate the mHb, IHbm, and IHbl (C) and PVTp (E). Scale bar = 500  $\mu$ m (A,C,E), 125  $\mu$ m (B,D,F). (TIF)

**Figure S2 Representative photomicrographs illustrating the effects of fr lesion on the expression of TH in the Hb and PVTp.** TH immunostaining (dark grey) in the Hb of a sham (A) and lesioned (B) rat illustrates the significant decrease in habenular TH expression following fr lesion. TH immunostaining in the PVTp is unaffected by fr lesion, as illustrated by comparing a sham (C) and fr lesioned rat (D). Scale bar = 500  $\mu$ m. (TIF)

**Figure S3 Representative photomicrographs illustrating the effects of high-intensity footshock on the expression of cFos in the RMTg, Hb and PVTp in a sham operated rat.** cFos expression within the RMTg (A,B), habenula (C,D) and PVTp (E,F). Boxes within the low-magnification micrographs (left) approximate the area of the high-magnification illustrations (right), which show visible cFos positive objects. The RMTg core is the area within the circle (A). Dotted lines delineate the mHb, IHbm, and IHbl (C) and PVTp (E). Scale bar = 500  $\mu$ m (A,C,E), 125  $\mu$ m (B,D,F). (TIF)

**Figure S4 Representative photomicrographs illustrating the effects of high-intensity footshock on the expression of cFos in the RMTg, habenula and PVTp in an fr lesioned rat.** cFos expression within the RMTg (A,B), habenula (C,D) and PVTp (E,F). Boxes within the low-magnification micrographs (left) approximate the area of the high-magnification illustrations (right), which show visible cFos positive objects. The RMTg core is the area within the circle (A). Dotted lines delineate the mHb, IHbm, and IHbl (C) and PVTp (E). Scale bar = 500  $\mu$ m (A,C,E), 125  $\mu$ m (B,D,F). (TIF)

## Acknowledgments

The authors would like to thank Drs. Michael Vogel, Adam Puche, and Tom Jhou for use of their equipment and advice in refining our immunostaining and cell counting procedures.

## References

1. Wise RA (2004) Dopamine, learning and motivation. *Nat Rev Neurosci* 5: 483–494.
2. Schultz W (2006) Behavioral theories and the neurophysiology of reward. *Ann Rev Psychol* 57: 87–115.
3. Berridge KC, Robinson TE (2003) Parsing reward. *Trends Neurosci* 26: 507–513.
4. Geisler S, Derst C, Veh RW, Zahm DS (2007) Glutamatergic afferents of the ventral tegmental area in the rat. *J Neurosci* 27: 5730–5743.
5. Omelchenko N, Sesack SR (2007) Glutamate synaptic inputs to ventral tegmental area neurons in the rat derive primarily from subcortical sources. *Neuroscience*, 146: 1259–74.
6. Lammel S, Lim BK, Ran D, Huang KW, Betley MJ, et al. (2012) Input-specific control of reward and aversion in the ventral tegmental area. *Nature* 491: 212–217.
7. Liu Z, Shin R, Ikemoto S (2008) Dual role of medial A10 dopamine neurons in affective encoding. *Neuropsychopharmacology* 33: 3010–3020.
8. Schultz W (1998) Predictive reward signal of dopamine neurons. *J Neurophysiol* 80: 1–27.
9. Schultz W (2007) Behavioral dopamine signals. *Trends Neurosci* 30: 203–210.
10. Ungless MA, Magill PJ, Bolam JP (2004) Uniform inhibition of dopamine neurons in the ventral tegmental area by aversive stimuli. *Science* 303: 2040–2042.
11. Bianco IH, Wilson SW (2009) The habenular nuclei: a conserved asymmetric relay station in the vertebrate brain. *Philos Trans R Soc Lond B Biol Sci* 364: 1005–1020.
12. Klemm WR (2004) Habenular and interpeduncularis nuclei: shared components in multiple-function networks. *Med Sci Monit* 10: RA261–273.
13. Shepard PD, Holcomb HH, Gold JM (2006) Schizophrenia in translation: the presence of absence: habenular regulation of dopamine neurons and the encoding of negative outcomes. *Schizophrenia Bulletin* 32: 417–421.
14. Geisler S, Trimble M (2008) The lateral habenula: no longer neglected. *CNS Spectr* 13: 484–489.
15. Hikosaka O (2010) The habenula: from stress evasion to value-based decision-making. *Nat Rev Neurosci* 11: 503–513.
16. Dong WQ, Wilson OB, Skolnick MH, Dafny N (1992) Hypothalamic, dorsal raphe and external electrical stimulation modulate noxious evoked responses of habenula neurons. *Neuroscience* 48: 933–940.
17. Gao DM, Jeaugey L, Pollack P, Benabid AL (1990) Intensity-dependent nociceptive responses from presumed dopaminergic neurons of the substantia nigra, pars compacta in the rat and their modification by lateral habenula inputs. *Brain Res* 529: 315–319.
18. Gao DM, Hoffman D, Benabid AL (1996) Simultaneous recording of spontaneous activities and nociceptive responses from neurons in the pars compacta of substantia nigra and in the lateral habenula. *Eur J Neurosci* 8: 1474–1478.
19. Matsumoto M, Hikosaka O (2007) Lateral habenula as a source of negative reward signals in dopamine neurons. *Nature* 447: 1111–1115.
20. Salas R, Baldwin P, de Biasi M, Montague PR (2010) BOLD Responses to Negative Reward Prediction Errors in Human Habenula. *Front Hum Neurosci* 4: 36.
21. Lecourtier L, Kelly PH (2005) Bilateral lesions of the habenula induce attentional disturbances in rats. *Neuropsychopharmacology* 30: 484–496.
22. Friedman A, Lax E, Dikshstein Y, Abraham L, Flaumenhaft Y, et al. (2011) Electrical stimulation of the lateral habenula produces an inhibitory effect on sucrose self-administration. *Neuropharmacology* 60: 381–387.
23. Friedman A, Lax E, Dikshstein Y, Abraham L, Flaumenhaft Y, et al. (2010) Electrical stimulation of the lateral habenula produces enduring inhibitory effect on cocaine seeking behavior. *Neuropharmacology* 59: 452–459.
24. Christoph GR, Leonzio RJ, Wilcox KS (1986) Stimulation of the lateral habenula inhibits dopamine-containing neurons in the substantia nigra and ventral tegmental area of the rat. *J Neurosci* 6: 613–619.
25. Ji H, Shepard PD (2007) Lateral habenula stimulation inhibits rat midbrain dopamine neurons through a GABA(A) receptor-mediated mechanism. *J Neurosci* 27: 6923–6930.
26. Hikosaka O, Sesack SR, Lecourtier L, Shepard PD (2008) Habenula: crossroad between the basal ganglia and the limbic system. *J Neurosci* 28: 11825–11829.
27. Brinschwitz K, Dittgen A, Madai VI, Lommel R, Geisler S, et al. (2010) Glutamatergic axons from the lateral habenula mainly terminate on GABAergic neurons of the ventral midbrain. *Neuroscience* 168: 463–476.
28. Omelchenko N, Bell R, Sesack SR (2009) Lateral habenula projections to dopamine and GABA neurons in the rat ventral tegmental area. *Eur J Neurosci* 30: 1239–1250.
29. Jhou TC, Geisler S, Marinelli M, Degarmo BA, Zahm DS (2009) The mesopontine rostromedial tegmental nucleus: A structure targeted by the lateral

## Author Contributions

Conceived and designed the experiments: PLB PDS. Performed the experiments: PLB PDS. Analyzed the data: PLB PDS. Contributed reagents/materials/analysis tools: PLB PDS. Wrote the paper: PLB PDS.

- habenula that projects to the ventral tegmental area of Tsai and substantia nigra compacta. *J Comp Neurol* 513: 566–596.
30. Kauling J, Veinante P, Pawlowski SA, Freund-Mercier MJ, Barrot M (2009) Afferents to the GABAergic tail of the ventral tegmental area in the rat. *J Comp Neurol* 513: 597–621.
31. Colussi-Mas J, Geisler S, Zimmer L, Zahm DS, Béroed A (2007) Activation of afferents to the ventral tegmental area in response to acute amphetamine: a double-labelling study. *Eur J Neurosci* 26: 1011–1025.
32. Jhou TC, Fields HL, Baxter MG, Saper CB, Holland PC (2009) The rostromedial tegmental nucleus (RMTg), a GABAergic afferent to midbrain dopamine neurons, encodes aversive stimuli and inhibits motor responses. *Neuron* 61: 786–800.
33. Hong S, Jhou TC, Smith M, Saleem KS, Hikosaka O (2011) Negative reward signals from the lateral habenula to dopamine neurons are mediated by rostromedial tegmental nucleus in primates. *J Neurosci* 31: 11457–11471.
34. Matsumoto M, Hikosaka O (2009) Representation of negative motivational value in the primate lateral habenula. *Nat Neurosci* 12: 77–84.
35. Barrot M, Sesack SR, Georges F, Pistis M, Hong S, et al. (2012) Braking dopamine systems: A new GABA master structure for mesolimbic and nigrostriatal functions. *J Neurosci* 32: 14094–14101.
36. Skagerberg G, Lindvall O, Björklund A (1984) Origin, course and termination of the mesohabenular dopamine pathway in the rat. *Brain Res* 307: 99–108.
37. Li YQ, Takada M, Mizuno N (1993) The sites of origin of dopaminergic afferent fibers to the lateral habenular nucleus in the rat. *J Comp Neurol* 333: 118–133.
38. Committee for the update of the Guide for the care and use of laboratory animals (2011) Guide for the care and use of laboratory animals, 8<sup>th</sup> edition. Washington: The National Academies Press.
39. Paxinos G, Watson C (2007) The rat brain in stereotaxic coordinates 6<sup>th</sup> edition. Burlington: Academic Press.
40. Shirayama Y, Chen AC, Nakagawa S, Russell DS, Duman RS (2002) Brain-derived neurotrophic factor produces antidepressant effects in behavioral models of depression. *J Neurosci* 22: 3251–3261.
41. Zhu L, Wu L, Yu B, Liu X (2011) The participation of a neurocircuit from the paraventricular thalamus to amygdala in the depressive like behavior. *Neurosci Lett* 488: 81–86.
42. Chastrette N, Pfaff DW, Gibbs RB (1991) Effects of daytime and nighttime stress on Fos-like immunoreactivity in the paraventricular nucleus of the hypothalamus, the habenula, and the posterior paraventricular nucleus of the thalamus. *Brain Res* 563: 339–344.
43. McKittrick DJ, Calaresu FR (1993) Expression of Fos in rat central nervous system elicited by afferent stimulation of the femoral nerve. *Brain Res* 632: 127–135.
44. Stephenson CP, Hunt GE, Topple AN, McGregor IS (1999) The distribution of 3,4-methylenedioxymethamphetamine “Ecstasy”-induced c-fos expression in rat brain. *Neuroscience* 92: 1011–1023.
45. Baker H, Ruggiero DA, Alden S, Anwar M, Reis DJ (1986) Anatomical evidence for interactions between catecholamine- and adrenocorticotropin-containing neurons. *Neuroscience* 17: 469–484.
46. Kitahama K, Okamura H, Goldstein M, Nagatsu I, Béroed A, et al. (1989) A new group of tyrosine hydroxylase-immunoreactive neurons in the cat thalamus. *Brain Res* 478: 156–160.
47. Garcia-Cabezas MA, Martinez-Sanchez P, Sanchez-Gonzalez MA, Garzon M, Cavada G (2009) Dopamine innervations in the thalamus: monkey versus rat. *Cerebral Cortex* 19: 424–434.
48. Sanchez-Gonzalez MA, Garcia-Cabezas MA, Rico B, Cavada C (2005) The primate thalamus is a key target for brain dopamine. *J Neurosci* 25: 6076–6083.
49. Mahieux G, Benabid AL (1987) Naloxone-reversible analgesia induced by electrical stimulation of the habenula in the rat. *Brain Res* 406: 118–129.
50. Benabid AL, Jeaugey L (1989) Cells of the rat lateral habenula respond to high-threshold somatosensory inputs. *Neurosci Lett* 96: 289–294.
51. Wirtshafter D, Asin KE, Pitzer MR (1994) Dopamine agonists and stress produce different patterns of Fos-like immunoreactivity in the lateral habenula. *Brain Res* 633: 21–26.
52. Greenwood BN, Foley TE, Berhans D, Maier SF, Fleshner M (2005) The consequences of uncontrollable stress are sensitive to duration of prior wheel running. *Brain Res* 1033: 164–178.
53. Hamamura T, Ichimaru Y (1997) Amphetamine sensitization augments amphetamine-induced Fos expression in the lateral habenula. *Brain Res* 767: 140–143.
54. Engber TM, Koury EJ, Dennis SA, Miller MS, Contreras PC, et al. (1998) Differential patterns of regional c-Fos induction in the rat brain by amphetamine and the novel wakefulness-promoting agent modafinil. *Neurosci Lett* 241: 95–98.
55. Zahm DS, Becker ML, Freiman AJ, Strauch S, Degarmo B, et al. (2010) Fos after single and repeated self-administration of cocaine and saline in the rat:



- emphasis on the Basal forebrain and recalibration of expression. *Neuropsychopharmacology* 35: 445–463.
56. Brown EE, Robertson GS, Fibiger HC (1992) Evidence for conditional neuronal activation following exposure to a cocaine-paired environment: role of forebrain limbic structures. *J Neurosci* 12: 4112–4121.
  57. Shabel SJ, Proulx CD, Trias A, Murphy RT, Malinow R (2012) Input to the lateral habenula from the basal ganglia is excitatory, aversive, and suppressed by serotonin. *Neuron* 74: 475–481.
  58. Geisler S, Andres KH, Veh RW (2003) Morphologic and cytochemical criteria for the identification and delineation of individual subnuclei within the lateral habenular complex of the rat. *J Comp Neurol* 458: 78–97.
  59. Phillipson OT, Pycock CJ (1982) Dopamine projections of the ventral tegmentum project to both medial and lateral habenula. Some implications for habenular function. *Exp Brain Res* 45: 89–94.
  60. Wechsler LR, Savaki HE, Sokoloff L (1979) Effects of d- and l-amphetamine on local cerebral glucose utilization in the conscious rat. *Journal of Neurochemistry* 32: 15–22.
  61. McCulloch J, Savaki HE, Sokoloff L (1980) Influence of dopaminergic systems on the lateral habenular nucleus of the rat. *Brain Research* 194: 117–124.
  62. Wooten GF, DiStefano P, Collins RC (1982) Regional glucose utilization during morphine withdrawal in the rat. *Proceedings of the National Academies of Science USA* 79: 3360–3364.
  63. Shen X, Ruan X, Zhao H (2012) Stimulation of midbrain dopaminergic structures modifies firing rates of rat lateral habenula neurons. *PLoS one* 7: e34323.
  64. Kowski AB, Veh RW, Weiss T (2001) Dopaminergic activation excites rat lateral habenular neurons in vivo. *Neuroscience* 161: 1154–1165.
  65. Le Masurier M, Cowen PJ, Sharp T (2004) Fos immunocytochemical studies on the neuroanatomical sites of action of acute tyrosine depletion in the rat brain. *Psychopharmacology (Berl)* 171: 435–440.
  66. Goncalves L, Segó C, Metzger M (2012) Differential projections from the lateral habenula to the rostromedial tegmental nucleus and ventral tegmental area in the rat. *J Comp Neurol* 520: 1278–1300.
  67. Wang DV, Tsien JZ (2011) Convergent processing of both positive and negative motivational signals by the VTA dopamine neuronal populations. *PLoS One* 6: e17047.
  68. Guarraci FA, Kapp BS (1999) An electrophysiological characterization of ventral tegmental area dopaminergic neurons during differential pavlovian fear conditioning in the awake rabbit. *Behav Brain Res* 99: 169–179.
  69. Matsumoto M, Hikosaka O (2009) Two types of dopamine neuron distinctly convey positive and negative motivational signals. *Nature* 459: 837–841.
  70. Brischoux F, Chakraborty S, Brierley DI, Ungless MA (2009) Phasic excitation of dopamine neurons in ventral VTA by noxious stimuli. *PNAS* 106: 4894–4899.
  71. Moore RY, Halaris AE, Jones BE (1978) Serotonin neurons of the midbrain raphe: ascending projections. *Journal of Comparative Neurology* 180: 417–438.
  72. Gottesfeld Z (1983) Origin and distribution of noradrenergic innervations in the habenula: a neurochemical study. *Brain Research* 26: 299–304.
